# Supplementary material for: Drosophila seminal sex peptide associates with rival as well as own sperm, providing SP function in polyandrous females
Source: eLife. 2020 Jul 16;9:e58322. doi: 10.7554/eLife.58322 (PMC7398695; doi:10.7554/eLife.58322)
Supplement: Figure 3—source data 1. [file elife-58322-fig3-data1.xlsx]

## Sheet: Sheet1
Receptivity data
Fig 3D
Receptivity of females, singly-mated to SP-null, SOT and CS @1d ASM; or doubly mated to SP-null+SOT @ 1d ASSM
		Remated (Yes)	No-Remating (No)	Total	% Yes	% No
1	SP-null	28	4	32	88	12
2	SOT	18	16	34	53	47
3	SP-null+ SOT	3	29	32	9	91
4	CS	1	32	33	3	97
Fig 3E
Receptivity of females, singly-mated to SP-null, SOT and CS @4d ASM; or doubly mated to SP-null+SOT @ 4d ASSM
		Remated (Yes)	No-Remating (No)	Total	% Yes	% No
1	SP-null	23	4	27	85	15
2	SOT	25	4	29	86	14
3	SP-null+SOT	23	9	32	72	28
4	CS	4	31	35	11	89
