# Supplementary material for: Drosophila seminal sex peptide associates with rival as well as own sperm, providing SP function in polyandrous females
Source: eLife journal article supplement (doi:10.7554/elife.58322), 2020-07-16
Supplement: figures [file elife-58322-figures-v2.pdf]

---

## Figures and figure supplements

*Drosophila* seminal sex peptide associates with rival as well as own sperm, providing SP function in polyandrous females

**Snigdha Misra and Mariana F Wolfner**

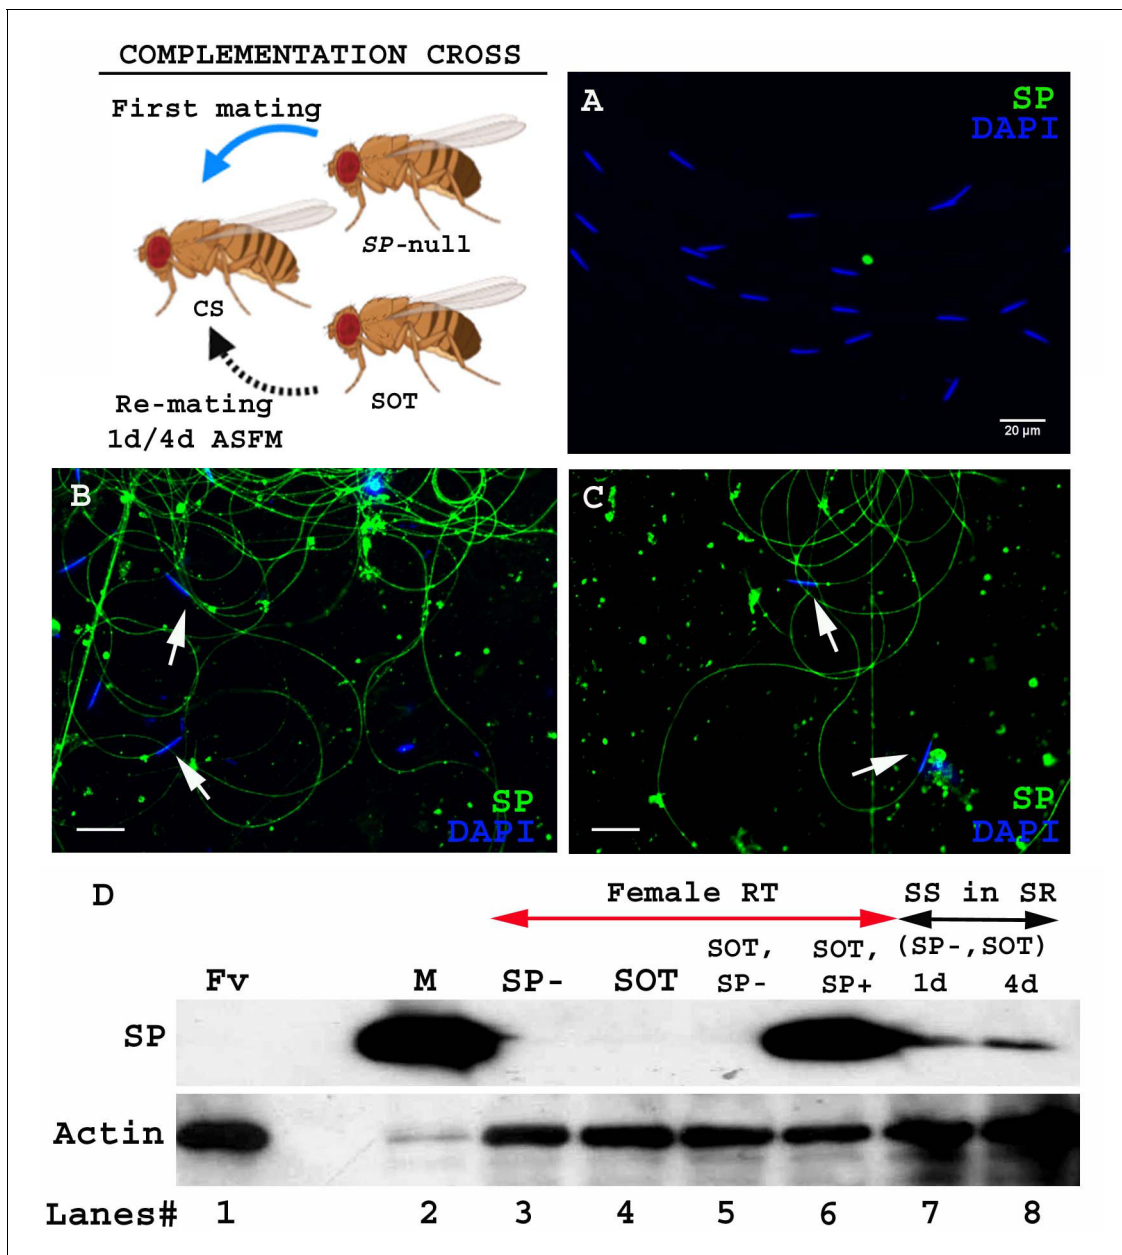

**Figure 1.** SP from a second male can bind to SP-deficient sperm of previous male stored within a mated female. Cartoon: Pictorial representation of the crossing scheme (fly images from Biorender). Wild type (CS) females were first mated to an *SP*-null male and then, at the indicated time, to a spermless (SOT) male. Sperm heads were stained with DAPI (blue) and SP was visualized with Alexa fluor 488, staining the sperm tail (green) and sperm head (cyan; overlapping blue/green). (A) Sperm from females singly mated to *SP*-null males, 1d ASM. (B) Sperm from females mated to *SP*-null males, remated to spermless males at 1d ASFM and (C) at 4d ASFM, both frozen 2 hr ASSM. White arrows indicate sperm heads. Bar = 20  $\mu$ m (D) Western blot lane numbers 1: Fv, reproductive tract (RT) of virgin female (negative control; n = 5), 2: M, a pair of male accessory gland (positive control; n = 1), 3: SP-, reproductive tracts of females mated to *SP*-null males, 2 hr ASM (n = 5), 4: SOT, reproductive tracts of females mated to spermless males, 1d ASM (n = 5), 5: SOT, SP-, reproductive tract of females mated to spermless males and then remated to *SP*-null males, 1d ASFM (n = 8 RT), 6: SOT, SP+, reproductive tract of females mated to spermless males and then remated to control (SP+) males at 1d ASFM, frozen 2 hr ASSM (positive control; n = 8 RT), 7: (SP-, SOT), 1d and 8: (SP-, SOT), 4d sperm isolated from the seminal receptacle of females mated to *SP*-null males and then remated to spermless males at 1d ASFM and 4d ASFM, frozen 2 hr ASSM (n = 15 SS). Actin served as loading control.

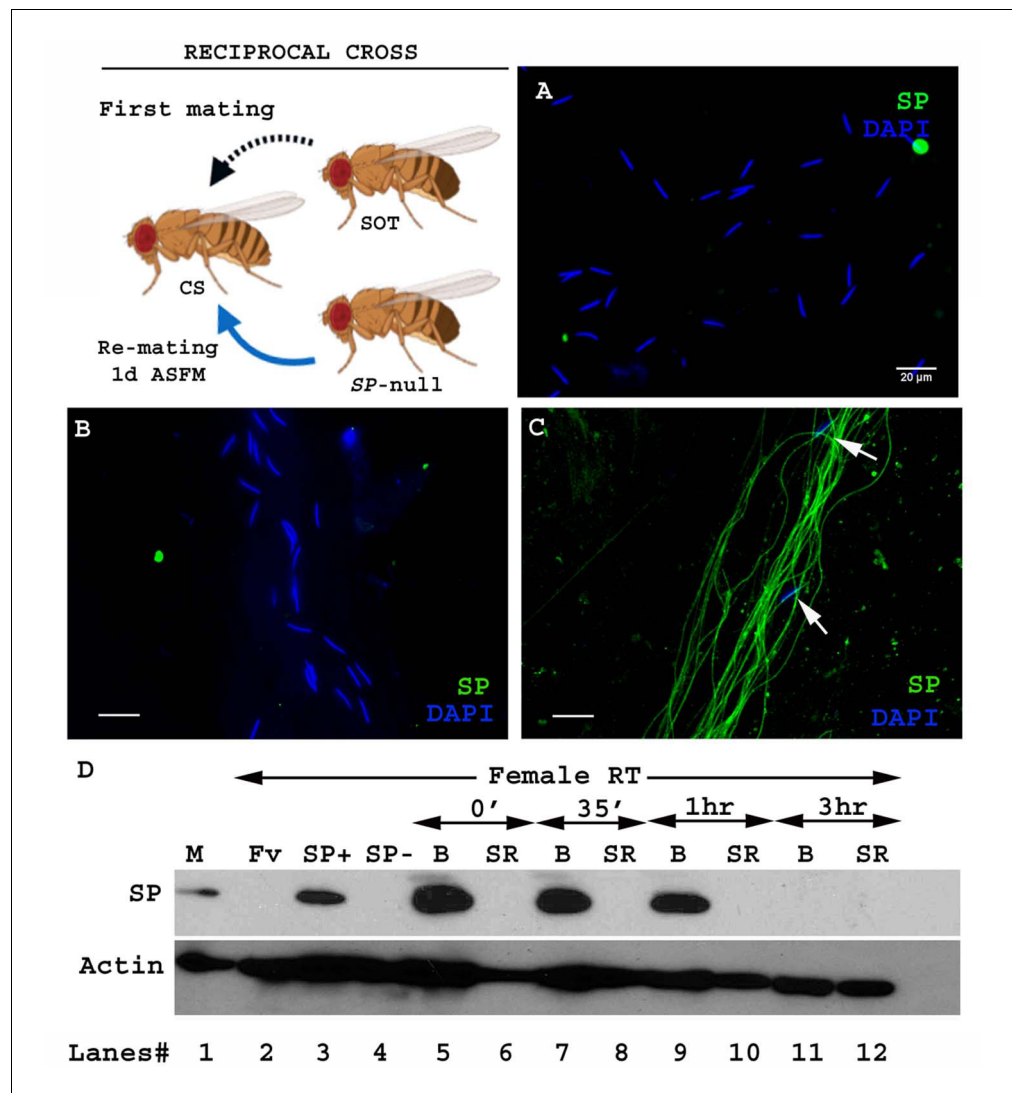

**Figure 2.** Sperm from a second male are not bound to SP from a prior spermless male. (Cartoon): Pictorial representation of the cross (fly images from Biorender); it is reciprocal of that in **Figure 1**. Females mated first with spermless (SOT) males and then a day later with *SP*-null males that provided sperm. Sperm heads were stained with DAPI (blue) and SP visualized with Alexa fluor 488, staining the sperm tail (green) and sperm head (cyan; overlapping blue/green). (A) Sperm from females singly mated to *SP*-null males, 2 hr ASM. (B) Sperm from females mated to spermless males and then remated to *SP*-null males, 1d ASFM. (C) Sperm from females mated to spermless males and then remated to *SP*+ males, 1d ASFM, serve as positive controls. Flies were frozen 2 hr ASFM. White arrows indicate sperm heads. Bar = 20  $\mu$ m (D) Western blot lane numbers 1: M, a pair of male accessory gland (positive control;  $n = 1$ ), 2: Fv, reproductive tract (RT) of virgin female (negative control;  $n = 5$ ), 3: *SP*+, reproductive tract of females mated to control males (TM3 siblings of *SP*-null males;  $n = 5$ ; positive control), 4: *SP*-, reproductive tract of females mated to *SP*-null males ( $n = 5$ ; negative control). 5–12: Proteins from Bursa (B) or seminal receptacle (SR) from females mated to spermless males frozen at 0 min immediately after mating, 35 min, 1 hr, and 3 hr ASM, respectively ( $n = 15$ ). Actin served as loading control.

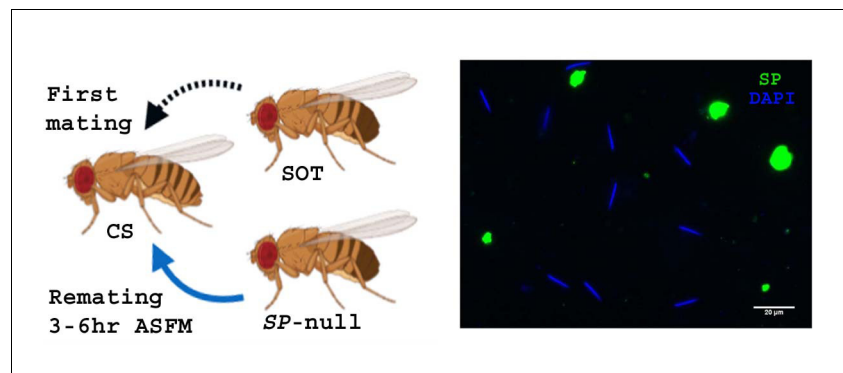

**Figure 2—figure supplement 1.** Cartoon: Pictorial representation of cross (fly images from Biorender). Females mated first with spermless (*sot*) male and then 3–6 hr ASFM with *SP*-null male that provided sperm. Panel: Sperm from SR of females mated to spermless males and then remated to *SP*-null males, 3–6 hr ASFM, frozen at 2 hr ASFM. Sperm heads were stained with DAPI (blue) and SP (green) probed with Alexa fluor 488 ( $n = 5$ ; Bar = 20  $\mu\text{m}$ ).

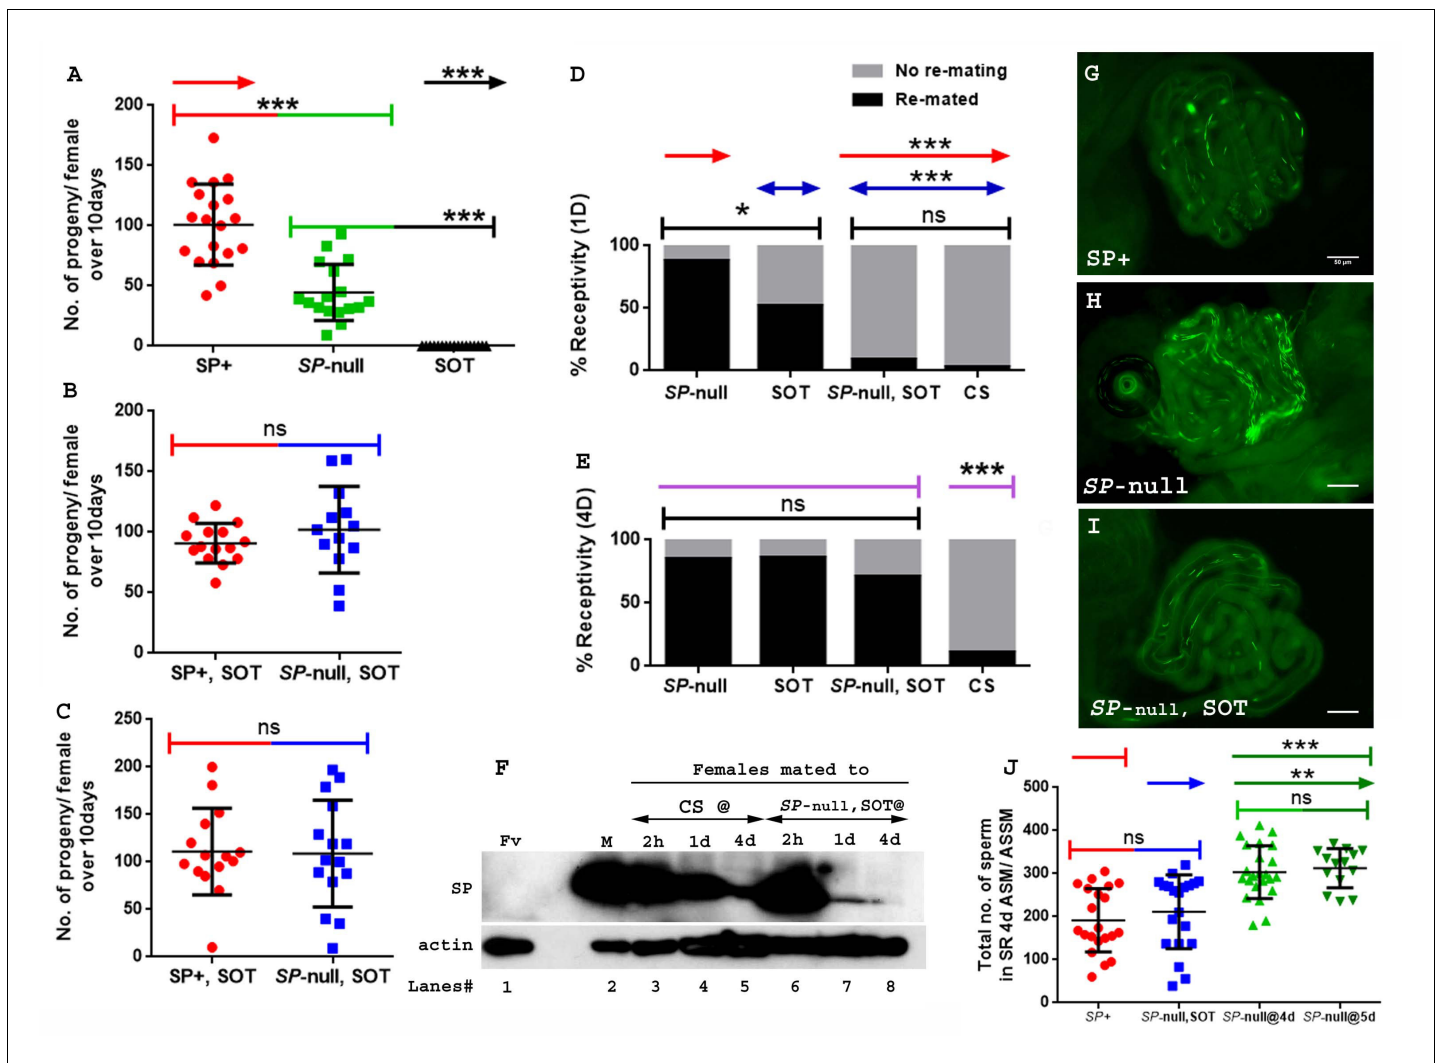

**Figure 3.** Remating with spermless males restores fertility, delays receptivity and optimizes efficient sperm release in females that previously mated to *SP*-null males. (A) Graphical representation of numbers of progeny produced by each female over the span of 10 days, following mating to control (TM3 siblings of *SP*-null males: *SP*+; red), *SP*-null males (*SP*-null; green), or spermless males (SOT),  $p^{***} < 0.001$ ;  $n = 15-20$ . (B) Fertility of females mated to *SP*-null males and then remated to spermless males at 1d ASFM (*SP*-null, SOT; blue,  $n = 15-20$ ) and (C) Fertility of females mated to *SP*-null males and then remated to spermless males at 4d ASFM (*SP*-null, SOT; blue,  $n = 15-20$ ) compared to females mated to control males and then remated to spermless males (*SP*+, SOT, red,  $ns$  = non significant). (D) Percentage receptivity of females mated to *SP*-null males and then remated to spermless males (*SP*-null, SOT) at 1d ASFM, when compared to females singly mated to *SP*-null males (red arrows), spermless (SOT, blue arrows) or CS males, 1d ASM ( $p^* < 0.05$ ;  $p^{***} < 0.001$ ;  $n = 15-20$  for each technical replicate). (E) Percentage receptivity of females mated to *SP*-null males and then remated to spermless males (*SP*-null, SOT) at 4d ASFM, when compared to females singly mated to *SP*-null males, spermless (SOT) or CS males (purple arrows), 4d ASM ( $p^{***} < 0.001$ ;  $n = 15-20$  for each technical replicate). (F) Western blot lane numbers 1: Fv, reproductive tract (RT) of five virgin females (negative control); 2: M, a pair of male accessory gland (positive control); 3, 4, 5: RT of females mated to CS males, flash frozen at 2 hr ( $n = 5$ ), 1d ( $n = 15$ ) and 4d ( $n = 15$ ) ASM, respectively; 6, 7, 8: RT of females mated to *SP*-null males and then subsequently mated to spermless males at 1d ASFM, flash frozen 2 hr ( $n = 5$ ), 1d ( $n = 15$ ) and 4d ( $n = 15$ ) ASSM, respectively. Actin served as loading control. (G) Sperm in the seminal receptacle (SR) of a typical female mated to a control male (*SP*+; *ProtB-eGFP*) at 4d ASM. (H) Sperm in the SR of a typical female mated to *SP*-null; *ProtB-eGFP* male at 4d ASM. (I) Sperm in the SR of a typical female, mated to *SP*-null; *ProtB-eGFP* and subsequently remated to a spermless male at 1d ASFM, and frozen at 4d ASSM. In (G-I) sperm heads are green due to eGFP. Bar = 50  $\mu$ m. (J) Graphical representation of sperm counts in SRs of females singly-mated to control (*SP*+, red, TM3 siblings of *SP*-null; *ProtB-eGFP*), *SP*-null (green) or doubly-mated to *SP*-null and spermless male (*SP*-null, SOT, blue) represented in G, H, I panels ( $p^{**} < 0.01$ ;  $p^* < 0.05$ ;  $ns$  = non significant;  $n = 15-20$ ).

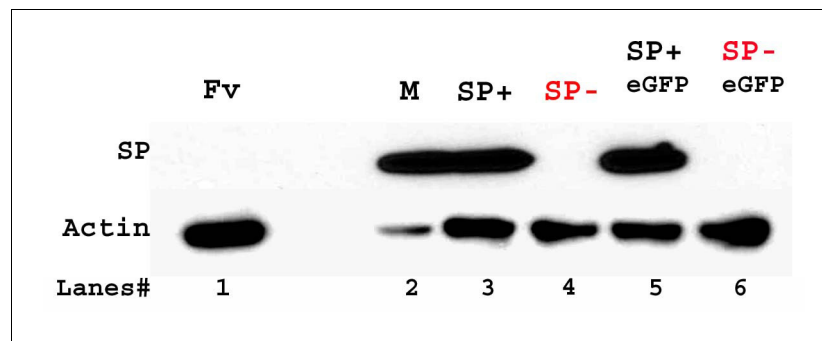

**Figure 3—figure supplement 1.** Western blot probed for SP. Lanes/samples are 1: Fv, reproductive tract (RT) of three virgin females (negative control); 2: M, one pair of male accessory glands (positive control); 3: SP+, RT of three females mated to control (TM3 siblings of *SP*-null males; positive control) males at 2 hr ASM; 4: SP-, RT of three females mated to *SP*-null males at 2 hr ASM; 5: SP+ eGFP, RT of three females mated to control (TM3 siblings of *SP*-null; *ProtB*-eGFP males; positive control) males at 2 hr ASM; 6: SP- eGFP, RT of three females mated to *SP*-null; *ProtB*-eGFP males at 2 hr ASM. Actin served as loading control.

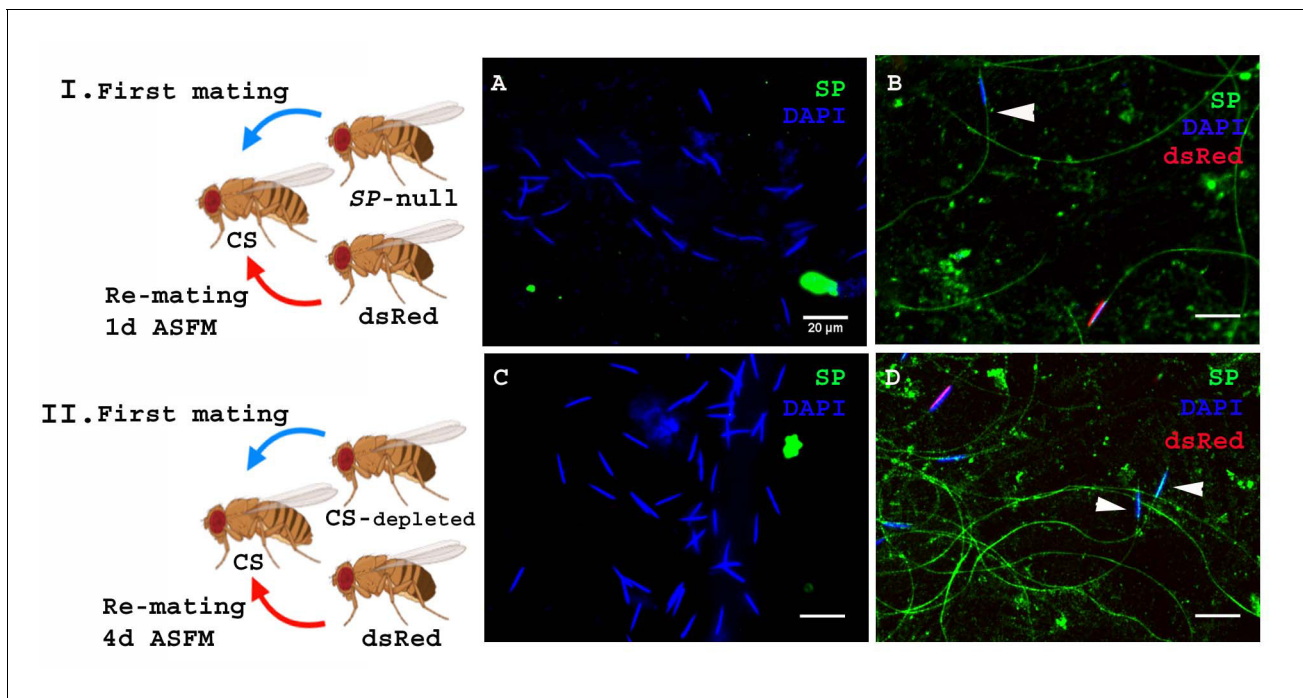

**Figure 4.** SP from a male who also provides sperm can bind to SP-deficient sperm as well as to the donor's sperm. Cartoon (I): Pictorial representation of the experimental cross (fly images from Biorender). Females mated to SP-null males were remated to control (*ProtB-dsRed*) males at 1d ASFM. (A) Sperm from females singly mated to SP-null males, 2 hr ASFM (blue sperm-head). (B) Sperm from females mated to SP-null males (blue sperm-head) remated to *ProtB-dsRed* (red+ blue sperm-head) males at 1d ASFM. SP was visualized with Alexa fluor 488, staining the sperm (head+ tail) green. Flies were frozen 2 hr ASFM. White arrows indicate sperm heads (n = 10; Bar = 20 μm). Cartoon (II): Pictorial representation of the substitute cross (fly images from Biorender). Females mated to SFP depleted control (CS) males were remated to control (*Prot B-dsRed*) males at 4d ASFM. (C) Sperm from females singly-mated to SFP depleted CS males at 4d ASFM (blue sperm-head). (D) Sperm from females mated to SFP depleted CS males (blue sperm-head), remated to *ProtB-dsRed* (red+ blue sperm-head) males at 4d ASFM. SP was visualized with Alexa fluor 488, staining the sperm (head+ tail) green. Flies were frozen 2 hr ASFM. White arrows indicate sperm heads (n = 10; Bar = 20 μm).



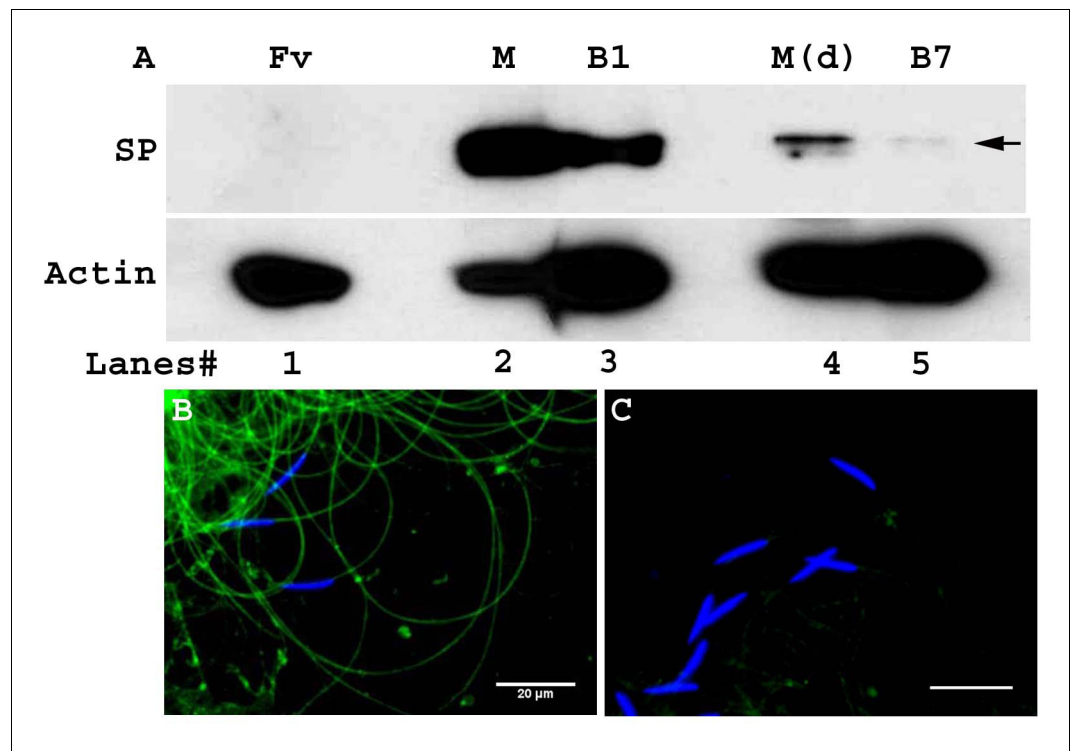

**Figure 4—figure supplement 1.** Little to no SP is transferred by multiply-mated males. (A) Western blot probed for SP. Lanes/samples are 1: Fv, reproductive tract (RT) of two virgin females (negative control); 2: M, one pair of male accessory glands from a 3-day-old unmated virgin male; 3: B1, RT of four females mated to control unmated virgin males, frozen at 2 hr ASM; 4: M(d), one pair of male accessory glands dissected from a multiply mated male (previously mated with six virgin females); 5: B7, RT of four females mated to multiply-mated males, frozen at 2 hr ASM. Actin served as loading control. (B) Sperm dissected from females mated to unmated males, frozen at 2 hr ASM. (C) Sperm dissected from females mated to multiply mated males, frozen at 2 hr ASM. Sperm heads were stained with DAPI (blue) and presence of SP (green) was detected with Alexa fluor 488 ( $n = 5$ ; Bar = 20  $\mu\text{m}$ ).



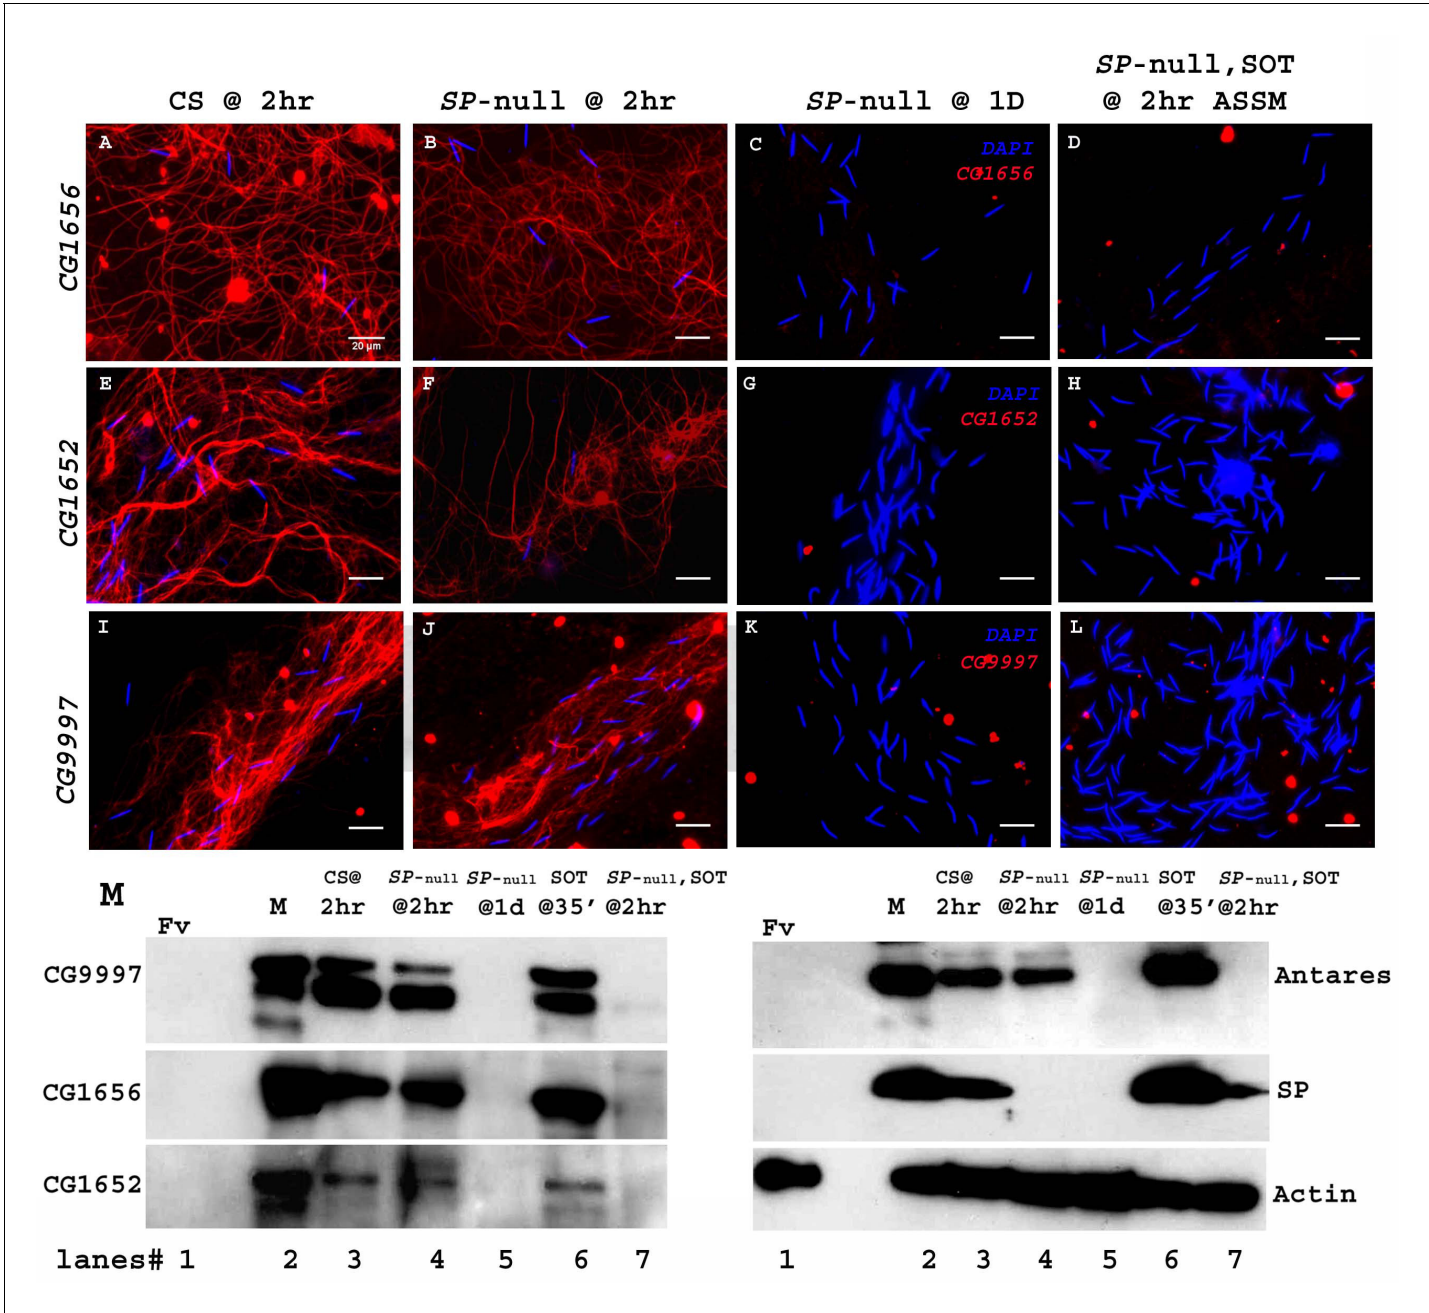

**Figure 5.** Sperm do not bind detectable LTR-SFPs from a second male. Females mated to wild type (CS) males at 2 hr ASM show LTR-SFPs bound to sperm, CG1656 (A), CG1652 (E), CG9997 (I). Females mated to *SP*-null males show the same (B,F,J) but by 1d postmating LTR-SFPs' signal were no longer detected on sperm (C,G,K) confirming previous reports (Singh et al., 2018). Females mated to *SP*-null males and then remated to spermless males also do not show detectable signal for sperm-LTR-SFP binding for CG1656 (D), CG1652 (H) and CG9997 (L), 2 hr ASSM, although they have SP bound (Figure 1). Sperm stained for the indicated LTR-SFP detected with Alexa fluor 594 (red) and sperm-head stained with DAPI (blue). Bar = 20 μm (M) Western blot probed for indicated LTR-SFPs. Lanes/samples are 1: Fv, reproductive tract (RT) of three virgin females (negative control); 2: M, one pair of male accessory glands (positive control); 3: CS @ 2 hr, sperm dissected from SR of 20 females mated to wild type (CS) males at 2 hr ASM; 4: *SP*-null @ 2 hr, sperm dissected from SR of 20 females mated to *SP*-null males at 2 hr ASM; 5: *SP*-null @1d, sperm dissected from SR of 20 females mated to *SP*-null males at 1d ASM; 6: SOT@35', reproductive tract of three females mated to spermless males at 35'ASM (positive control); 7: *SP*-null, SOT @ 2 hr, sperm dissected from SR of 20 females mated to *SP*-null males and then remated to spermless males at 1d ASFm, and frozen at 2 hr ASSM. Lanes were probed for LTR-SFPs CG9997, CG1656, antares and CG1652 and SP as described in the text. Actin served as loading control.

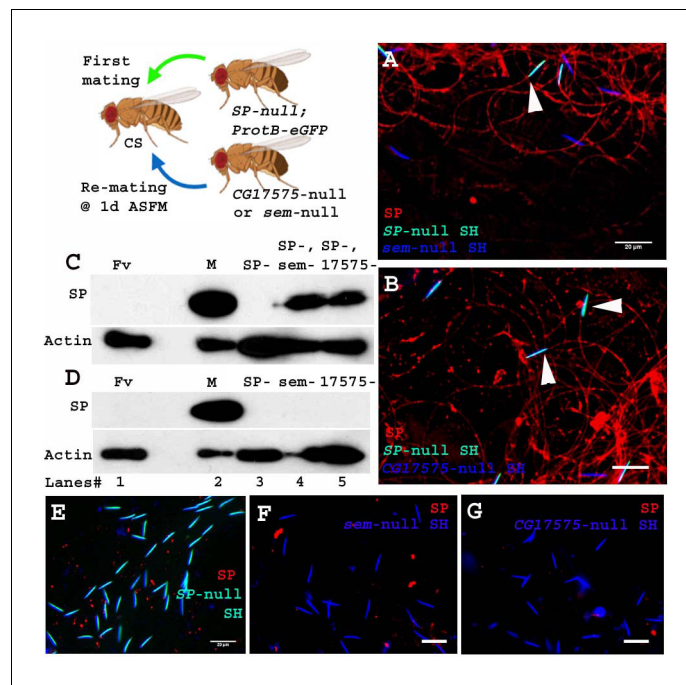

**Figure 6.** Sperm received from SP-null males do not require CG17575 or seminase from a second male to bind SP from that male. Cartoon: Pictorial representation of the experimental cross (fly images from Biorender). Females mated first with *SP-null; ProtB-eGFP* males [cyan sperm-head; DAPI(blue)+eGFP(green)] and then a day later with *CG17575-null* or *seminase-null* males (blue sperm-head; DAPI stained) and frozen, 2 hr ASSM. SP was visualized with Alexa fluor 594, staining the sperm (head+ tail) red. (A) Sperm from females mated to *SP-null; ProtB-eGFP* males and then remated to *seminase-null* males, 1d ASFM. (B) Sperm from females mated to *SP-null; ProtB-eGFP* males and then remated to *CG17575-null* males, 1d ASFM. (C) Western blot probed for SP. Lanes/samples are 1: Fv, reproductive tract (RT) of three virgin females (negative control); 2: M, one pair of male accessory glands (positive control); 3: SP-, sperm dissected from 20 females mated to *SP-null; ProtB-eGFP* males at 2 hr ASM; 4: SP-, sem-, sperm dissected from 20 females mated to *SP-null; ProtB-eGFP* males and subsequently to *seminase-null* males at 1d ASFM, frozen at 2 hr ASSM; 5: SP-, 17575-, sperm dissected from 20 females mated to *SP-null; ProtB-eGFP* males and subsequently to *CG17575-null* males at 1d ASFM, frozen at 2 hr ASSM. (D) Western blot probed for SP. Lanes/samples are 1: Fv, reproductive tract (RT) of three virgin females (negative control); 2: M, one pair of male accessory glands (positive control); 3: SP-, sperm dissected from 20 females mated to *SP-null; ProtB-eGFP* males at 2 hr ASM; 4: sem-, sperm dissected from 20 females mated to *seminase-null* males at 2 hr ASM; 5: 17575-, sperm dissected from 20 females mated to *CG17575-null* males at 2 hr ASM. Actin served as loading control. (E) Sperm isolated from females singly mated to *SP-null; ProtB-eGFP* males, 2 hr ASM. (F) Sperm isolated from females singly mated to *seminase-null* male, 2 hr ASM. (G) Sperm isolated from females singly mated to *CG17575-null* male, 2 hr ASM. White arrows indicate sperm heads (represented as SH, n = 10; Bar = 20  $\mu$ m).

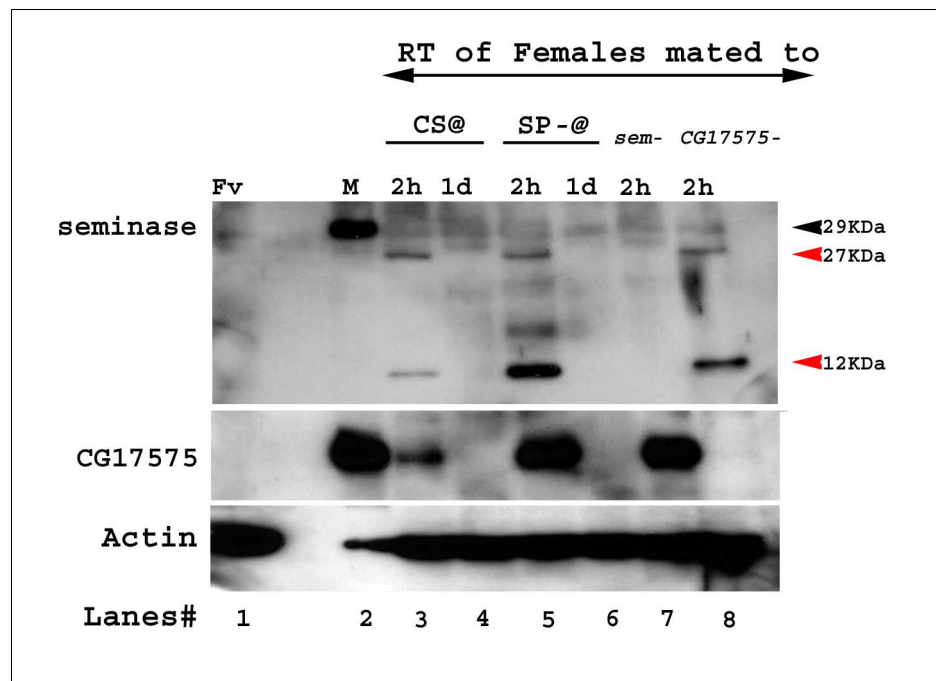

**Figure 6—figure supplement 1.** Western blot probed for seminase and CG17575. Lanes/samples are 1: Fv, reproductive tract (RT) of three virgin females (negative control); 2: M, one pair of male accessory glands (positive control); 3–4: RT of five females mated to wild type (CS) males at 2 hr and 1d ASM, respectively; 5–6: RT of five females mated to *SP-null*; *ProtB-eGFP* males at 2 hr and 1d ASM, respectively; 7: RT of five females mated to *seminase*-null males at 2 hr ASM; 8: RT of five females mated to *CG17575*-null males at 2 hr ASM. Black arrows indicate full length seminase, red arrows indicate the cleavage products of seminase, post-mating in the female RT. Actin served as loading control.
